# Supplementary material for: Modification of the gate electrode by self-assembled monolayers in flexible electrolyte-gated organic field effect transistors: work function vs. capacitance effects
Source: Royal Society of Chemistry journal article supplement (doi:10.1039/c8ra05300f), 2018-01-01
Supplement: c8ra05300f1.pdf [file c8ra05300f1.pdf]

## Electronic Supporting Information (ESI)

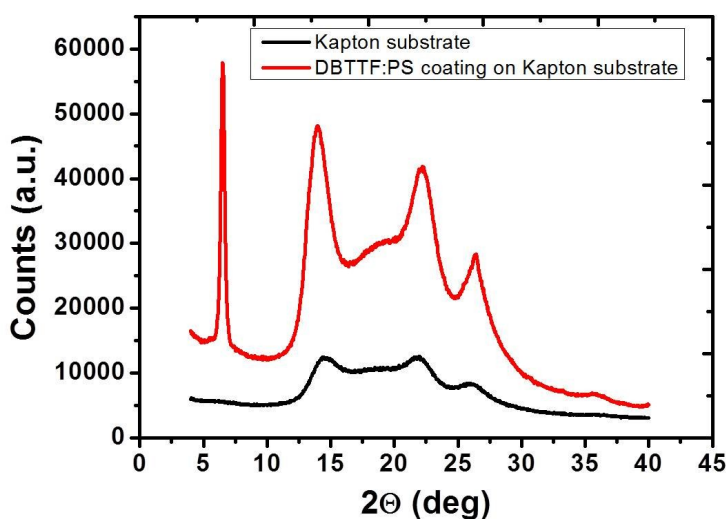

Figure S1 X-ray diffractogram of bare Kapton substrate and DBTTF:PS coated substrate. The peak at 6.55° is characteristic of the  $\gamma$ -phase of DBTTF.

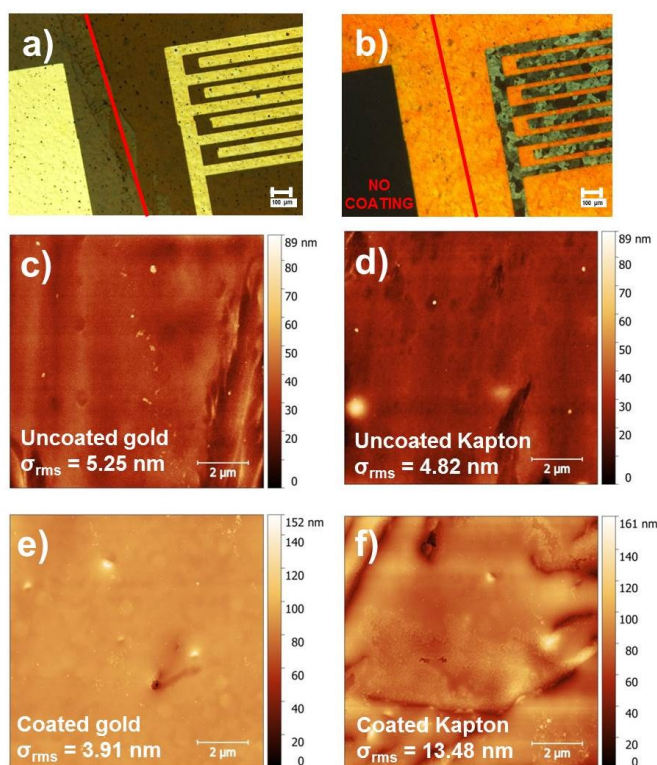

Figure S2 a) Optical microscopy image of S/D electrodes near the gate electrode region showing the patterned area of the semiconductor and b) its corresponding optical polarized image. c) and d) show the gold and Kapton® region of the devices and e) and f) the OSC blend-coated regions. It is worth mentioning that the scratch features are peculiar of Kapton® itself and they are not related to our process.

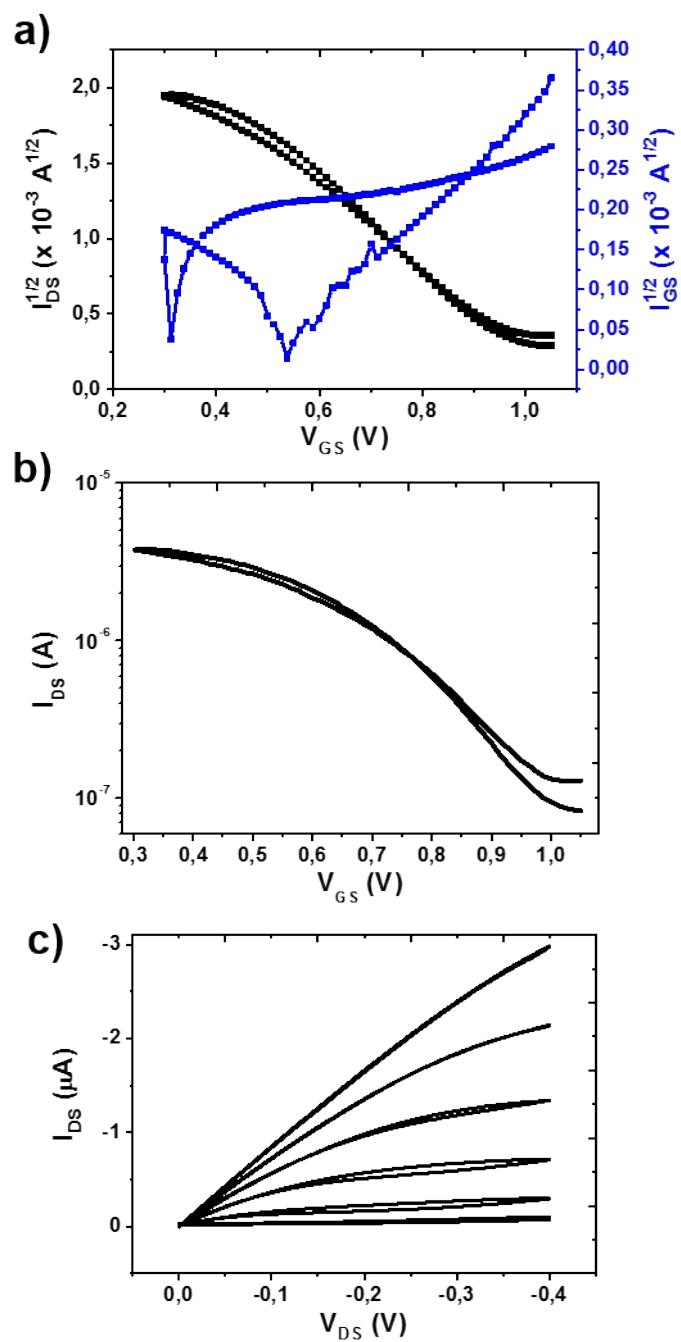

Figure S3 Lin-lin transfer characteristic and b) Log-lin transfer characteristic of EGOFET device recorded in saturation regime ( $V_{DS} = -0.4$  V). c) Output characteristic of EGOFET device obtained by sweeping the gate voltage from 1 V to 0.5 V. All the measurements are performed in MilliQ water.

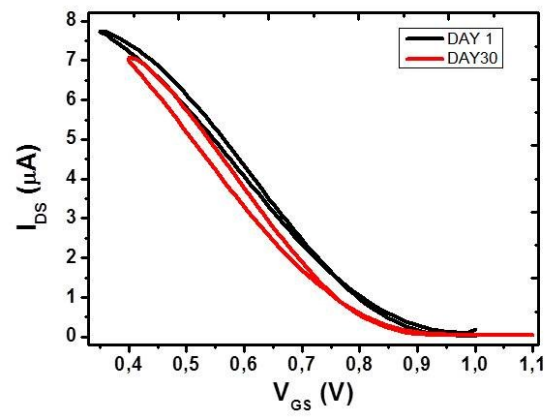

Figure S4 Transfer characteristics of DBTTF:PS flexible device measured with coplanar gate architecture at day 1 and after one month ( $V_{DS} = -0.1V$ ).

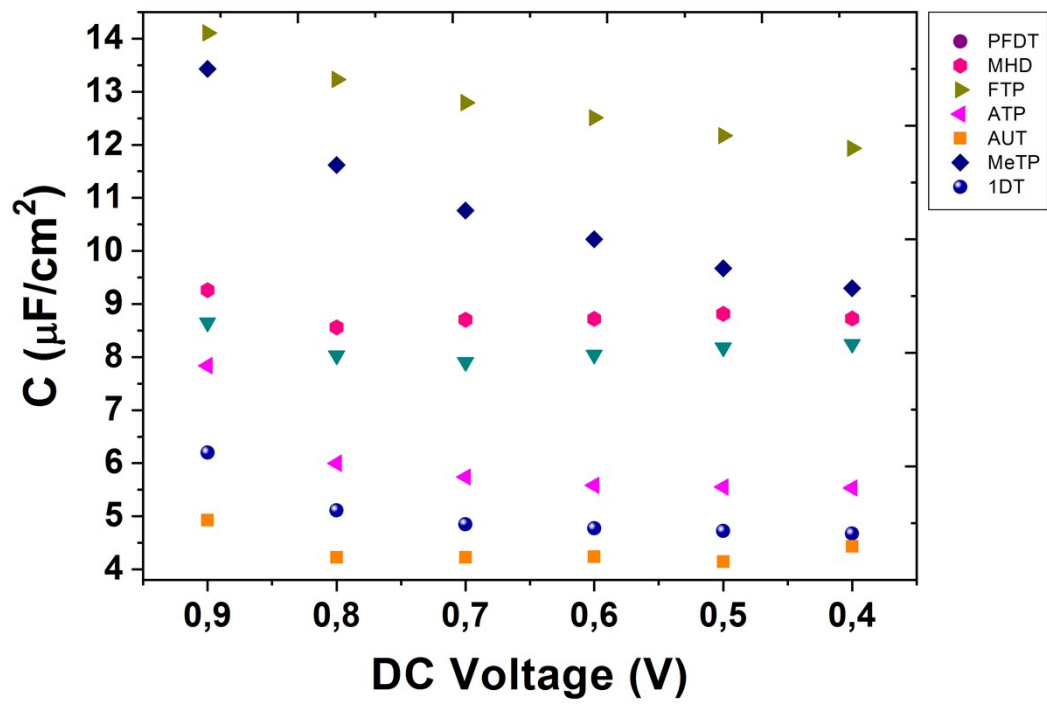

Figure S5 Capacitance behavior of each SAM recorded at different DC bias. The DC voltage range has been selected according to the operational gate voltage ( $V_{GS}$ ) of the EGOFET device.

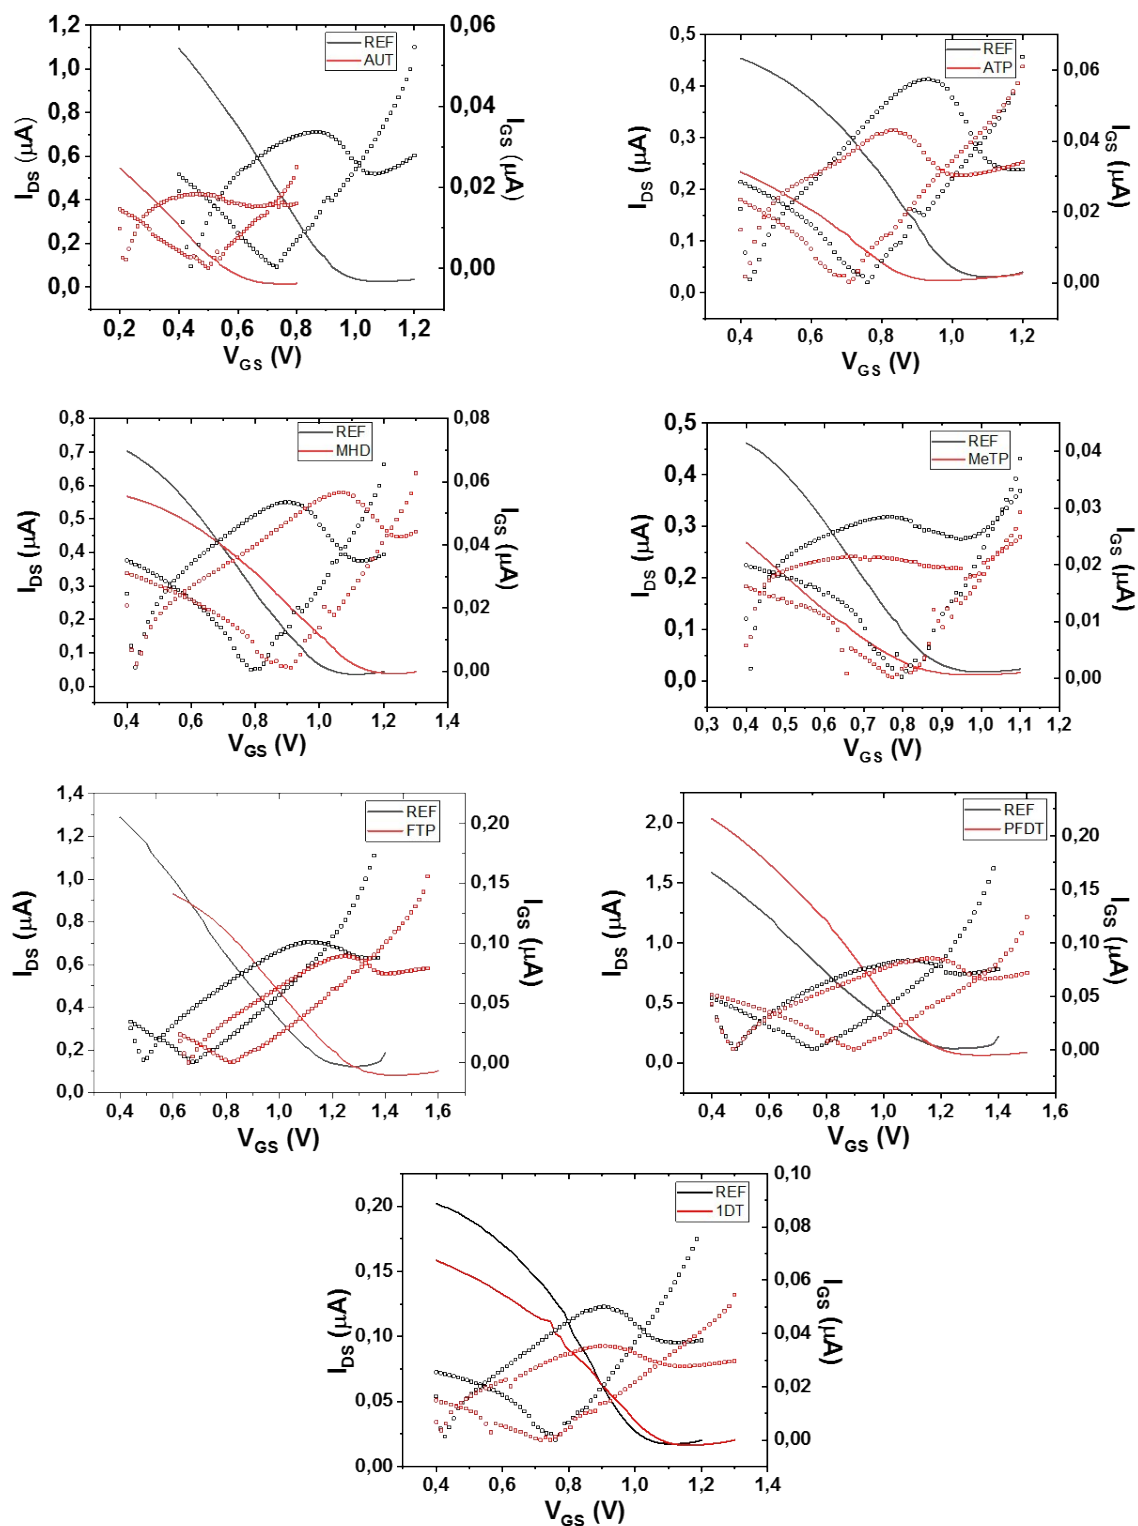

Figure S6 Transfer characteristic (linear regime  $V_{DS} = -0.1$  V) measured for all devices with different SAM. Black curve refers to the reference measurement with a bare gate electrode while the red one has been recorded after the functionalization of the gate terminal with a SAM.
